# Supplementary material for: The Regeneration of Large-Sized and Vascularized Adipose Tissue Using a Tailored Elastic Scaffold and dECM Hydrogels
Source: MDPI journal article supplement (doi:10.3390/ijms222212560), 2021-11-22
Supplement: s1 [file s1]

# **The Regeneration of Large-Sized and Vascularized Adipose Tissue Using a Tailored Elastic Scaffold and dECM Hydrogels**

**Su Hee Kim<sup>1,2,†</sup>, Donghak Kim<sup>1,3,†</sup>, Misun Cha<sup>2</sup>, Soo Hyun Kim<sup>1,3,4,\*</sup> and Youngmee Jung<sup>1,5,\*</sup>**

<sup>1</sup> Biomaterials Research Center, Korea Institute of Science and Technology (KIST), 5, Hwarang-ro 14-gil, Seongbuk-gu, Seoul 02792, Korea; sweess@imedifab.com (S.H.K.); cherish7693@korea.ac.kr (D.K.)

<sup>2</sup> R&D Center, Medifab Co. Ltd., 70 Dusan-ro, Geumcheon-gu, Seoul 08584, Korea; cmsbest@imedifab.com

<sup>3</sup> KU-KIST Graduate School of Converging Science and Technology, Korea University, 145 Anam-ro, Seongbuk-gu, Seoul 02841, Korea

<sup>4</sup> Korea Institute of Science and Technology (KIST) Europe, Campus E 7.1, 66123 Saarbrücken, Germany

<sup>5</sup> School of Electrical and Electronic Engineering, YU-KIST Institute, Yonsei University, Seoul 03722, Korea

\* Correspondence: soohkim@kist.re.kr (S.H.K.); winnie97@kist.re.kr (Y.J.)

† These authors contributed equally to this paper.

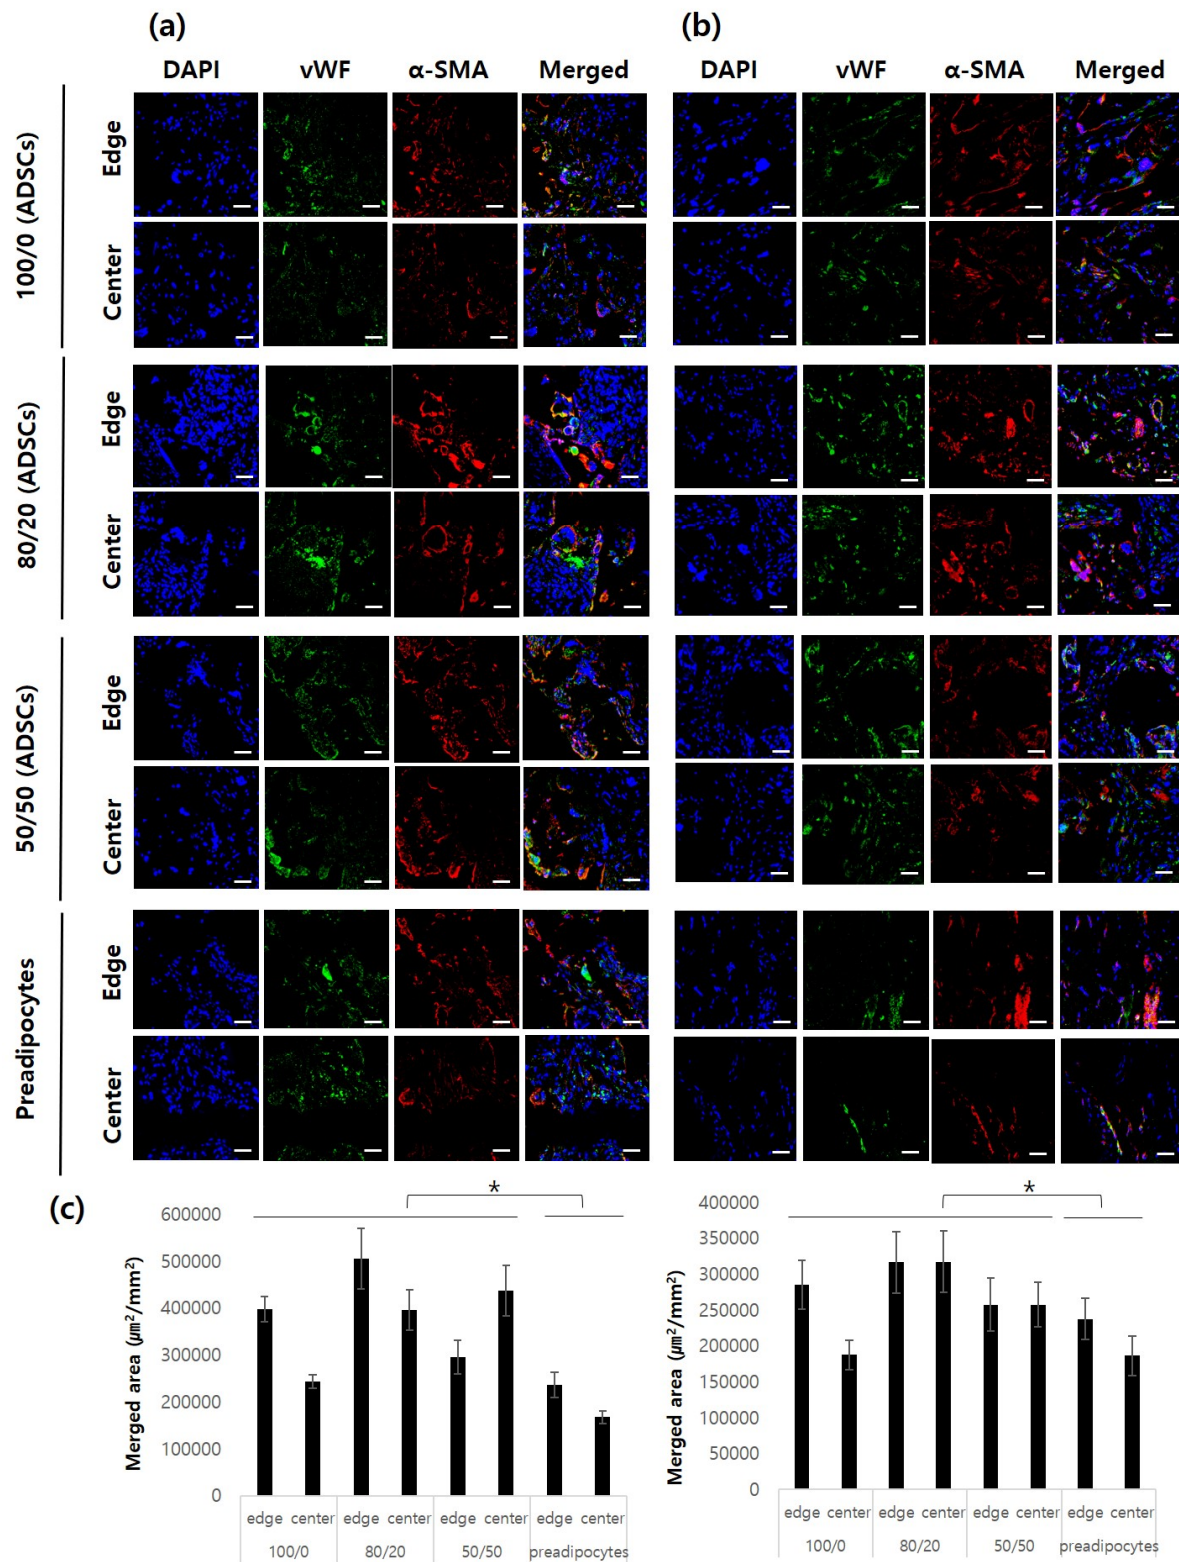

**Figure S1.** Angiogenesis in constructs. (a) Representative immunostaining of endothelial cells (ECs) and smooth muscle cells (SMCs) in each group at 4 and (b) 12 weeks after implantation. (c) Quantification of the merged area of the vWF<sup>+</sup> and  $\alpha$ -SMA<sup>+</sup> vessels ( $\mu\text{m}^2/\text{mm}^2$ ). Scale bar: 100  $\mu\text{m}$  (\*  $p < 0.05$ ).

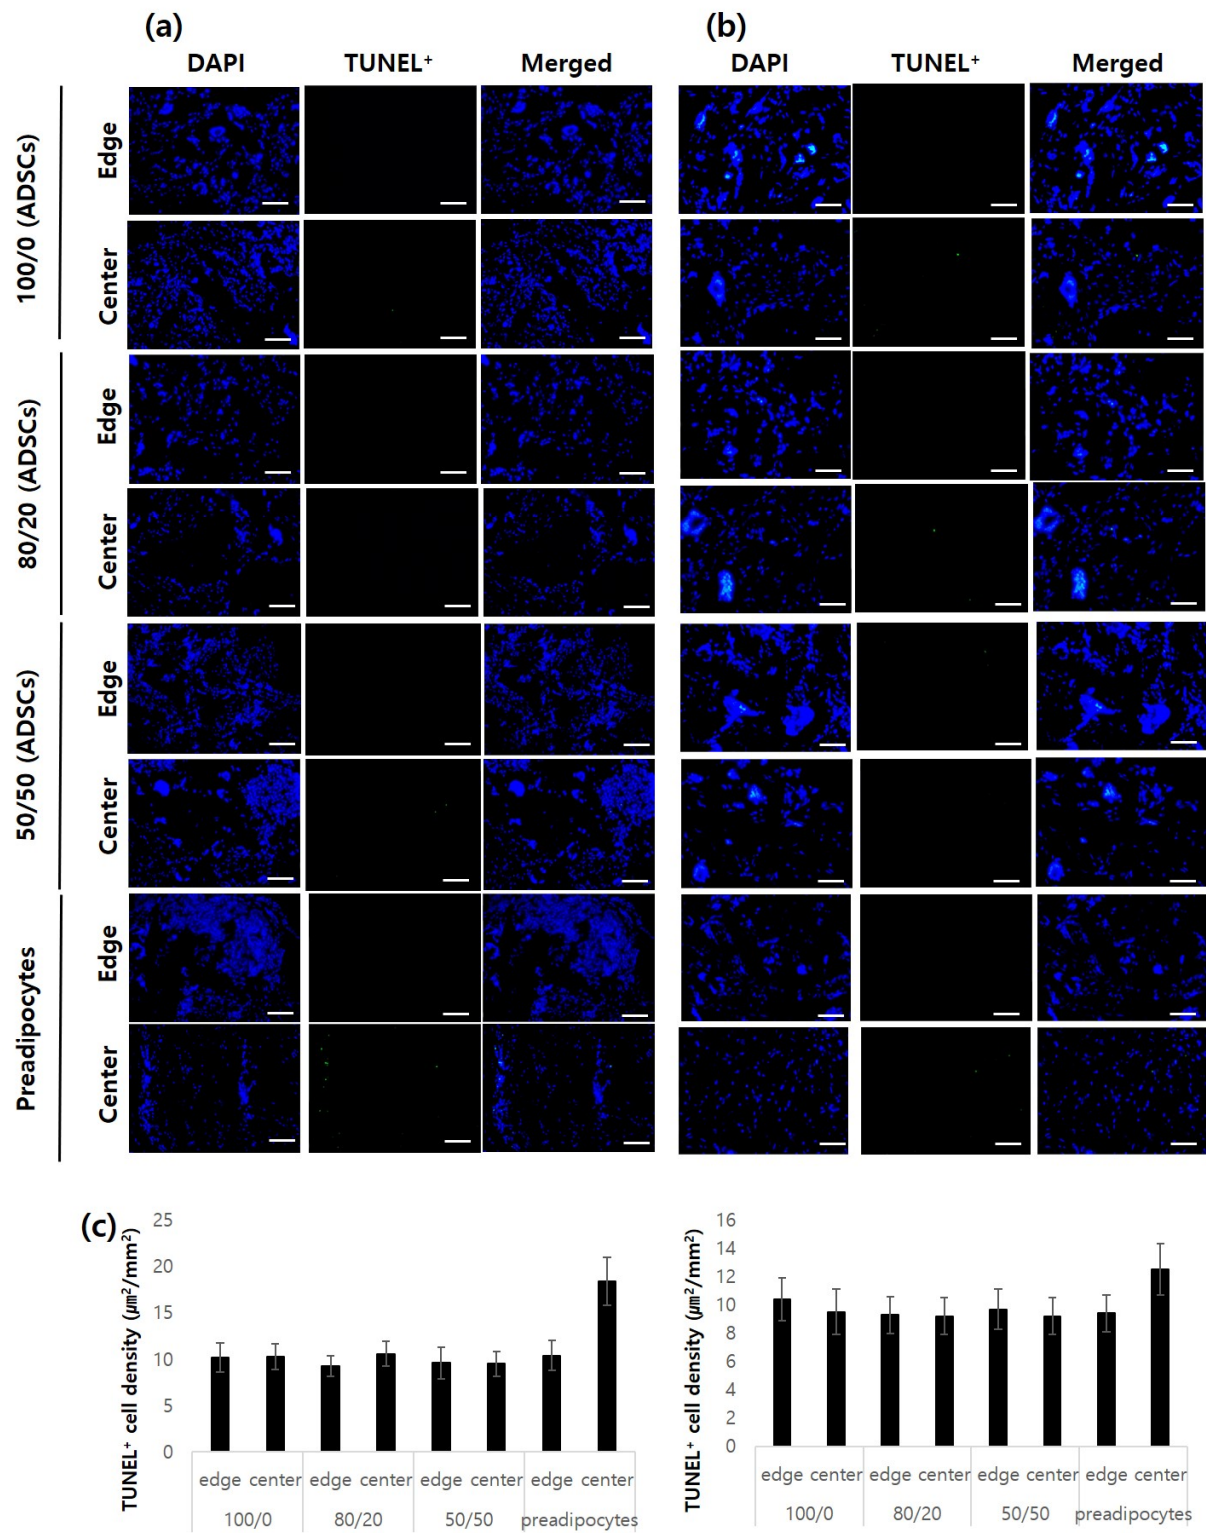

**Figure S2.** Apoptosis of seeded cells in constructs. **(a)** Representative immunostaining of apoptotic cells in each group at 4 and **(b)** 12 weeks after implantation. **(c)** Quantification of the stained area ( $\mu\text{m}^2/\text{mm}^2$ ). Scale bar: 100  $\mu\text{m}$  (\*  $p < 0.05$ ).
